# Supplementary material for: Oligodendroglial somatic SNCA copy number gains are associated with inclusions and disease onset in multiple system atrophy
Source: Research Square preprint supplement (doi:10.21203/rs.3.rs-8701777/v1), 2026-01-30
Supplement: Supplementary file 2 [file 8e646febf74534a315c6c4fb.xlsx]

## Sheet: SNCA CNV counts summary
Donor ID	Classification	Region	Total cells	SOX10+	SOX10-	Total CN2	Overall Gains	Overall Losses	CN2 SOX10+ aSyn+	CN2 SOX10+ aSyn-	Gains SOX10+ aSyn-	Gains SOX10+ aSyn+	Losses SOX10+ aSyn-	Losses SOX10+ aSyn+	CN2 SOX10- aSyn+	CN2 SOX10- aSyn-	Gains SOX10- aSyn+	Gains SOX10- aSyn-	Losses SOX10- aSyn-	Losses SOX10- aSyn+	Total SOX10+ CN2	Total SOX10- CN2	Total SOX10+ gain+	% SOX10+ gain	% SOX10+ loss	Total SOX10+ inclusions	% SOX10+ inclusions	% SOX10- inclusions	%SOX10- Gain	% SOX10- Loss	% Overall Gain	% Overall loss
Control09	Control	Putamen	82	42	40	68	5	9	0	33	3	0	6	0	0	35	0	2	3	0	33	35	3	7.14286	14.2857	0	0	0	5	7.5	6.09756	10.9756
Control11	Control	Putamen	106	47	59	97	2	7	0	44	1	0	2	0	0	53	0	1	5	0	44	53	1	2.12766	4.25532	0	0	0	1.69492	8.47458	1.88679	6.60377
Control08	Control	Putamen	97	63	34	81	6	10	0	53	5	0	5	0	0	28	0	1	5	0	53	28	5	7.93651	7.93651	0	0	0	2.94118	14.7059	6.18557	10.3093
Control01	Control	Putamen	42	17	25	32	6	4	0	16	1	0	0	0	0	16	0	5	4	0	16	16	1	5.88235	0	0	0	0	20	16	14.2857	9.52381
Control06	Control	Putamen	84	64	20	82	1	1	0	62	1	0	1	0	0	20	0	0	0	0	62	20	1	1.5625	1.5625	0	0	0	0	0	1.19048	1.19048
Control04	Control	Putamen	102	47	55	90	1	11	0	42	1	0	4	0	0	48	0	0	7	0	42	48	1	2.12766	8.51064	0	0	0	0	12.7273	0.980392	10.7843
Control02	Control	Putamen	74	17	57	67	3	4	0	16	0	0	1	0	0	51	0	3	3	0	16	51	0	0	5.88235	0	0	0	5.26316	5.26316	4.05405	5.40541
Control05	Control	Putamen	98	61	37	89	2	7	0	56	1	0	4	0	0	32	0	1	3	0	56	32	1	1.63934	6.55738	0	0	0	2.7027	8.10811	2.04082	7.14286
Control07	Control	Putamen	98	53	45	88	2	8	0	48	1	0	4	0	0	41	0	1	4	0	48	41	1	1.88679	7.54717	0	0	0	2.22222	8.88889	2.04082	8.16327
Control13	Control	Putamen	141	54	87	127	3	11	0	51	1	0	2	0	0	76	0	2	9	0	51	76	1	1.85185	3.7037	0	0	0	2.29885	10.3448	2.12766	7.80142
Control14	Control	Putamen	98	52	46	87	3	8	0	46	2	0	4	0	0	41	0	1	4	0	46	41	2	3.84615	7.69231	0	0	0	2.17391	8.69565	3.06122	8.16327
Control15	Control	Putamen	50	16	34	44	0	6	0	15	0	0	1	0	0	29	0	0	5	0	15	29	0	0	6.25	0	0	0	0	14.7059	0	12
OPCA01	OPCA	Putamen	85	44	41	63	10	12	3	29	4	1	5	2	0	31	0	5	5	0	32	31	5	11.3636	15.9091	6	13.6364	0	12.1951	12.1951	11.7647	14.1176
OPCA02	OPCA	Putamen	47	25	22	41	2	4	3	18	1	0	1	2	0	20	0	1	1	0	21	20	1	4	12	5	20	0	4.54545	4.54545	4.25532	8.51064
OPCA03	OPCA	Putamen	105	21	84	82	13	10	4	15	1	1	0	0	0	63	0	11	10	0	19	63	2	9.52381	0	5	23.8095	0	13.0952	11.9048	12.381	9.52381
OPCA04	OPCA	Putamen	142	102	40	106	14	22	28	45	9	3	11	6	6	27	1	1	3	2	73	33	12	11.7647	16.6667	37	36.2745	22.5	5	12.5	9.85915	15.493
OPCA11	OPCA	Putamen	83	19	64	62	13	8	1	15	2	0	1	0	1	45	0	11	7	0	16	46	2	10.5263	5.26316	1	5.26316	1.5625	17.1875	10.9375	15.6627	9.63855
OPCA12	OPCA	Putamen	50	20	30	39	8	3	1	13	2	1	3	0	0	25	0	5	0	0	14	25	3	15	15	2	10	0	16.6667	0	16	6
OPCA07	OPCA	Putamen	83	28	55	70	3	10	7	15	1	0	4	1	2	46	0	2	3	2	22	48	1	3.57143	17.8571	8	28.5714	7.27273	3.63636	9.09091	3.61446	12.0482
OPCA09	OPCA	Putamen	160	124	36	138	5	17	18	91	1	1	10	3	1	28	0	3	4	0	109	29	2	1.6129	10.4839	22	17.7419	2.77778	8.33333	11.1111	3.125	10.625
OPCA10	OPCA	Putamen	113	60	53	92	3	18	5	44	2	0	9	0	1	42	0	1	9	0	49	43	2	3.33333	15	5	8.33333	1.88679	1.88679	16.9811	2.65487	15.9292
SND08	SND	Putamen	82	34	48	51	17	14	11	11	2	6	3	1	3	26	0	9	10	0	22	29	8	23.5294	11.7647	18	52.9412	6.25	18.75	20.8333	20.7317	17.0732
SND10	SND	Putamen	54	14	40	43	1	10	0	12	0	0	2	0	0	31	0	1	7	1	12	31	0	0	14.2857	0	0	2.5	2.5	20	1.85185	18.5185
SND14	SND	Putamen	127	95	32	100	9	18	17	58	3	4	8	5	6	19	1	1	4	1	75	25	7	7.36842	13.6842	26	27.3684	25	6.25	15.625	7.08661	14.1732
SND02	SND	Putamen	137	87	50	113	9	15	12	57	3	3	8	4	1	43	0	3	3	0	69	44	6	6.89655	13.7931	19	21.8391	2	6	6	6.56934	10.9489
SND05	SND	Putamen	87	49	38	71	5	11	17	20	1	3	3	5	5	29	1	0	1	2	37	34	4	8.16327	16.3265	25	51.0204	21.0526	2.63158	7.89474	5.74713	12.6437
SND07	SND	Putamen	113	78	35	93	8	12	21	46	1	5	3	2	1	25	0	2	7	0	67	26	6	7.69231	6.41026	28	35.8974	2.85714	5.71429	20	7.07965	10.6195
SND15	SND	Putamen	88	66	22	67	6	15	11	43	2	2	5	3	1	12	0	2	6	1	54	13	4	6.06061	12.1212	16	24.2424	9.09091	9.09091	31.8182	6.81818	17.0455
SND13	SND	Putamen	86	55	31	63	6	17	20	18	0	4	7	6	6	19	0	2	4	0	38	25	4	7.27273	23.6364	30	54.5455	19.3548	6.45161	12.9032	6.97674	19.7674
SND04	SND	Putamen	81	41	40	69	9	3	18	14	3	4	1	1	1	36	0	2	1	0	32	37	7	17.0732	4.87805	23	56.0976	2.5	5	2.5	11.1111	3.7037
SND01	SND	Putamen	50	39	11	42	2	6	9	23	1	1	1	4	0	10	0	0	1	0	32	10	2	5.12821	12.8205	14	35.8974	0	0	9.09091	4	12
SND12	SND	Putamen	102	72	30	68	4	30	0	45	3	n.a.	24	n.a.	n.a.	23	n.a.	1	6	n.a.	45	23	3	4.16667	33.3333	0	n.a	0	3.33333	20	3.92157	29.4118
Control12	Control	Cerebellum	85	20	65	81	1	3	0	19	0	0	1	0	0	62	0	1	2	0	19	62	0	0	5	0	0	0	1.53846	3.07692	1.17647	3.52941
Control09	Control	Cerebellum	131	47	84	126	2	3	0	47	0	0	0	0	0	79	0	2	3	0	47	79	0	0	0	0	0	0	2.38095	3.57143	1.52672	2.29008
Control11	Control	Cerebellum	112	42	70	104	2	6	0	40	0	0	2	0	0	64	0	2	4	0	40	64	0	0	4.7619	0	0	0	2.85714	5.71429	1.78571	5.35714
Control08	Control	Cerebellum	143	17	126	134	5	4	0	14	1	0	2	0	0	120	0	4	2	0	14	120	1	5.88235	11.7647	0	0	0	3.1746	1.5873	3.4965	2.7972
Control01	Control	Cerebellum	135	15	120	125	5	5	0	13	1	0	1	0	0	112	0	4	4	0	13	112	1	6.66667	6.66667	0	0	0	3.33333	3.33333	3.7037	3.7037
Control06	Control	Cerebellum	141	29	112	132	7	2	0	27	1	0	1	0	0	105	0	6	1	0	27	105	1	3.44828	3.44828	0	0	0	5.35714	0.892857	4.96454	1.41844
Control04	Control	Cerebellum	85	54	31	76	2	7	0	49	1	0	4	0	0	27	0	1	3	0	49	27	1	1.85185	7.40741	0	0	0	3.22581	9.67742	2.35294	8.23529
Control05	Control	Cerebellum	62	33	29	54	1	7	0	29	0	0	4	0	0	25	0	1	3	0	29	25	0	0	12.1212	0	0	0	3.44828	10.3448	1.6129	11.2903
Control07	Control	Cerebellum	80	64	16	66	5	9	0	53	4	0	7	0	0	13	0	1	2	0	53	13	4	6.25	10.9375	0	0	0	6.25	12.5	6.25	11.25
Control13	Control	Cerebellum	144	67	77	132	5	7	0	61	2	0	4	0	0	71	0	3	3	0	61	71	2	2.98507	5.97015	0	0	0	3.8961	3.8961	3.47222	4.86111
Control14	Control	Cerebellum	97	51	46	87	2	8	0	43	2	0	6	0	0	44	0	0	2	0	43	44	2	3.92157	11.7647	0	0	0	0	4.34783	2.06186	8.24742
Control15	Control	Cerebellum	82	21	61	74	0	8	0	19	0	0	2	0	0	55	0	0	6	0	19	55	0	0	9.52381	0	0	0	0	9.83607	0	9.7561
Control03	Control	Cerebellum	152	56	96	140	6	6	0	53	2	0	1	0	0	87	0	4	5	0	53	87	2	3.57143	1.78571	0	0	0	4.16667	5.20833	3.94737	3.94737
OPCA01	OPCA	Cerebellum	107	14	93	83	13	11	2	6	2	2	2	0	0	75	0	9	9	0	8	75	4	28.5714	14.2857	4	28.5714	0	9.67742	9.67742	12.1495	10.2804
OPCA02	OPCA	Cerebellum	70	26	44	56	4	10	3	19	0	0	3	1	0	34	1	3	6	0	22	34	0	0	15.3846	4	15.3846	2.27273	9.09091	13.6364	5.71429	14.2857
OPCA03	OPCA	Cerebellum	90	60	30	60	17	13	20	20	3	9	5	3	7	13	2	3	4	1	40	20	12	20	13.3333	32	53.3333	33.3333	16.6667	16.6667	18.8889	14.4444
OPCA04	OPCA	Cerebellum	88	21	67	56	14	18	1	12	1	3	3	1	0	43	3	7	13	1	13	43	4	19.0476	19.0476	5	23.8095	5.97015	14.9254	20.8955	15.9091	20.4545
OPCA05	OPCA	Cerebellum	89	61	28	72	4	13	20	28	1	3	5	4	3	21	0	0	4	0	48	24	4	6.55738	14.7541	27	44.2623	10.7143	0	14.2857	4.49438	14.6067
OPCA11	OPCA	Cerebellum	62	30	32	50	5	7	3	19	3	1	3	1	1	27	0	1	3	0	22	28	4	13.3333	13.3333	5	16.6667	3.125	3.125	9.375	8.06452	11.2903
OPCA12	OPCA	Cerebellum	51	23	28	37	4	10	2	13	0	2	4	2	0	22	0	2	3	1	15	22	2	8.69565	26.087	6	26.087	3.57143	7.14286	14.2857	7.84314	19.6078
OPCA07	OPCA	Cerebellum	77	45	32	62	6	9	5	31	1	0	8	0	1	25	1	4	1	0	36	26	1	2.22222	17.7778	5	11.1111	6.25	15.625	3.125	7.79221	11.6883
OPCA08	OPCA	Cerebellum	70	24	46	57	4	9	8	10	1	1	3	1	2	37	0	2	3	2	18	39	2	8.33333	16.6667	10	41.6667	8.69565	4.34783	10.8696	5.71429	12.8571
OPCA10	OPCA	Cerebellum	126	50	76	104	10	12	1	35	3	1	7	3	1	67	0	6	2	0	36	68	4	8	20	5	10	1.31579	7.89474	2.63158	7.93651	9.52381
OPCA06	OPCA	Cerebellum	91	26	65	78	8	5	6	12	1	4	1	2	3	57	0	3	2	0	18	60	5	19.2308	11.5385	12	46.1538	4.61538	4.61538	3.07692	8.79121	5.49451
SND08	SND	Cerebellum	78	57	21	54	11	13	4	36	9	1	7	0	0	14	0	1	6	0	40	14	10	17.5439	12.2807	5	8.77193	0	4.7619	28.5714	14.1026	16.6667
SND09	SND	Cerebellum	64	43	21	51	1	12	20	17	1	0	3	2	4	10	0	0	6	1	37	14	1	2.32558	11.6279	22	51.1628	23.8095	0	33.3333	1.5625	18.75
SND10	SND	Cerebellum	81	23	58	71	2	8	1	18	1	0	2	1	0	52	0	1	5	0	19	52	1	4.34783	13.0435	2	8.69565	0	1.72414	8.62069	2.46914	9.87654
SND14	SND	Cerebellum	63	58	5	50	5	8	2	44	4	0	6	2	0	4	0	1	0	0	46	4	4	6.89655	13.7931	4	6.89655	0	20	0	7.93651	12.6984
SND02	SND	Cerebellum	106	70	36	86	9	11	7	49	6	0	7	1	3	27	0	3	3	0	56	30	6	8.57143	11.4286	8	11.4286	8.33333	8.33333	8.33333	8.49057	10.3774
SND06	SND	Cerebellum	82	58	24	69	0	13	5	44	0	0	8	1	1	19	0	0	4	0	49	20	0	0	15.5172	6	10.3448	4.16667	0	16.6667	0	15.8537
SND05	SND	Cerebellum	79	56	23	67	2	10	21	25	2	0	5	3	4	17	0	0	0	2	46	21	2	3.57143	14.2857	24	42.8571	26.087	0	8.69565	2.53165	12.6582
SND15	SND	Cerebellum	142	106	36	119	2	21	20	69	1	1	10	5	0	30	0	0	5	1	89	30	2	1.88679	14.1509	26	24.5283	2.77778	0	16.6667	1.40845	14.7887
SND13	SND	Cerebellum	84	63	21	68	3	13	22	29	3	0	4	5	1	16	0	0	3	1	51	17	3	4.7619	14.2857	27	42.8571	9.52381	0	19.0476	3.57143	15.4762
SND04	SND	Cerebellum	94	66	28	83	2	9	9	51	2	0	3	1	2	21	0	0	5	0	60	23	2	3.0303	6.06061	10	15.1515	7.14286	0	17.8571	2.12766	9.57447
SND01	SND	Cerebellum	97	26	71	86	1	10	3	21	1	0	1	0	0	62	0	0	9	0	24	62	1	3.84615	3.84615	3	11.5385	0	0	12.6761	1.03093	10.3093
Control09	Control	SN	119	35	84	108	7	4	0	31	3	0	1	0	0	77	0	4	3	0	31	77	3	8.57143	2.85714	0	0	0	4.7619	3.57143	5.88235	3.36134
Control11	Control	SN	100	25	75	90	4	6	0	23	1	0	1	0	0	67	0	3	5	0	23	67	1	4	4	0	0	0	4	6.66667	4	6
Control08	Control	SN	66	42	24	57	2	7	0	37	1	0	4	0	0	20	0	1	3	0	37	20	1	2.38095	9.52381	0	0	0	4.16667	12.5	3.0303	10.6061
Control09	Control	SN	75	26	49	65	5	5	0	23	2	0	1	0	0	42	0	3	4	0	23	42	2	7.69231	3.84615	0	0	0	6.12245	8.16327	6.66667	6.66667
Control01	Control	SN	48	18	30	36	2	10	0	15	0	0	3	0	0	21	0	2	7	0	15	21	0	0	16.6667	0	0	0	6.66667	23.3333	4.16667	20.8333
Control06	Control	SN	95	58	37	85	5	5	0	54	2	0	2	0	0	31	0	3	3	0	54	31	2	3.44828	3.44828	0	0	0	8.10811	8.10811	5.26316	5.26316
Control02	Control	SN	88	68	20	78	1	9	0	61	0	0	7	0	0	17	0	1	2	0	61	17	0	0	10.2941	0	0	0	5	10	1.13636	10.2273
Control05	Control	SN	135	40	95	122	5	8	0	38	0	0	2	0	0	84	0	5	6	0	38	84	0	0	5	0	0	0	5.26316	6.31579	3.7037	5.92593
Control07	Control	SN	81	66	15	70	2	9	0	55	2	0	9	0	0	15	0	0	0	0	55	15	2	3.0303	13.6364	0	0	0	0	0	2.46914	11.1111
Control13	Control	SN	50	30	20	44	0	6	0	27	0	0	3	0	0	17	0	0	3	0	27	17	0	0	10	0	0	0	0	15	0	12
Control14	Control	SN	57	18	39	48	1	8	0	14	0	0	4	0	0	34	0	1	4	0	14	34	0	0	22.2222	0	0	0	2.5641	10.2564	1.75439	14.0351
Control15	Control	SN	64	31	33	58	1	5	0	28	1	0	2	0	0	30	0	0	3	0	28	30	1	3.22581	6.45161	0	0	0	0	9.09091	1.5625	7.8125
Control03	Control	SN	86	38	48	73	6	7	0	37	0	0	1	0	0	36	0	6	6	0	37	36	0	0	2.63158	0	0	0	12.5	12.5	6.97674	8.13953
OPCA01	OPCA	SN	72	51	21	57	8	7	11	30	5	2	3	0	0	16	0	1	2	2	41	16	7	13.7255	5.88235	13	25.4902	9.52381	4.7619	19.0476	11.1111	9.72222
OPCA02	OPCA	SN	53	39	14	47	1	5	8	27	1	0	1	2	0	12	0	0	2	0	35	12	1	2.5641	7.69231	10	25.641	0	0	14.2857	1.88679	9.43396
OPCA03	OPCA	SN	109	64	45	86	4	19	17	33	0	2	6	6	3	33	0	2	5	2	50	36	2	3.125	18.75	25	39.0625	11.1111	4.44444	15.5556	3.66972	17.4312
OPCA04	OPCA	SN	72	33	39	46	10	16	10	13	0	5	1	4	2	21	1	4	11	0	23	23	5	15.1515	15.1515	19	57.5758	7.69231	12.8205	28.2051	13.8889	22.2222
OPCA12	OPCA	SN	66	37	29	49	8	9	2	24	3	1	4	3	1	22	1	3	2	0	26	23	4	10.8108	18.9189	6	16.2162	6.89655	13.7931	6.89655	12.1212	13.6364
OPCA07	OPCA	SN	91	56	35	80	5	6	6	42	4	0	4	0	0	32	0	1	2	0	48	32	4	7.14286	7.14286	6	10.7143	0	2.85714	5.71429	5.49451	6.59341
OPCA08	OPCA	SN	106	12	94	86	12	8	3	5	1	2	0	1	1	77	0	9	7	0	8	78	3	25	8.33333	6	50	1.06383	9.57447	7.44681	11.3208	7.54717
OPCA09	OPCA	SN	124	87	37	108	8	8	13	65	4	1	3	1	0	30	0	3	3	1	78	30	5	5.74713	4.5977	15	17.2414	2.7027	8.10811	10.8108	6.45161	6.45161
OPCA10	OPCA	SN	117	52	65	97	7	13	7	37	3	1	3	1	3	50	0	3	9	0	44	53	4	7.69231	7.69231	9	17.3077	4.61538	4.61538	13.8462	5.98291	11.1111
OPCA06	OPCA	SN	109	22	87	90	4	15	3	15	0	2	1	1	0	72	0	2	12	1	18	72	2	9.09091	9.09091	6	27.2727	1.14943	2.29885	14.9425	3.66972	13.7615
SND08	SND	SN	70	53	17	59	4	7	5	39	2	2	2	3	0	15	0	0	2	0	44	15	4	7.54717	9.43396	10	18.8679	0	0	11.7647	5.71429	10
SND09	SND	SN	112	33	79	85	5	22	5	23	2	0	3	0	3	54	0	3	17	2	28	57	2	6.06061	9.09091	5	15.1515	6.32911	3.79747	24.0506	4.46429	19.6429
SND14	SND	SN	77	35	42	59	10	8	2	23	5	1	3	1	0	34	0	4	3	1	25	34	6	17.1429	11.4286	4	11.4286	2.38095	9.52381	9.52381	12.987	10.3896
SND02	SND	SN	76	54	22	62	4	10	5	42	1	0	5	1	1	14	0	3	4	0	47	15	1	1.85185	11.1111	6	11.1111	4.54545	13.6364	18.1818	5.26316	13.1579
SND06	SND	SN	103	84	19	78	10	15	18	46	3	4	4	9	2	12	0	3	2	0	64	14	7	8.33333	15.4762	31	36.9048	10.5263	15.7895	10.5263	9.70874	14.5631
SND15	SND	SN	102	78	24	79	6	17	12	46	4	1	12	3	1	20	0	1	2	0	58	21	5	6.41026	19.2308	16	20.5128	4.16667	4.16667	8.33333	5.88235	16.6667
SND04	SND	SN	102	67	35	88	5	9	9	47	2	1	8	0	0	32	0	2	1	0	56	32	3	4.47761	11.9403	10	14.9254	0	5.71429	2.85714	4.90196	8.82353
SND01	SND	SN	67	46	21	58	2	7	3	35	2	0	4	2	0	20	0	0	1	0	38	20	2	4.34783	13.0435	5	10.8696	0	0	4.7619	2.98507	10.4478
SND12	SND	SN	101	74	27	73	5	23	n.a.	52	5	n.a.	17	n.a.	n.a.	21	n.a.	0	6	n.a.	52	21	5	6.75676	22.973	0		0	0	22.2222	4.9505	22.7723
This dataset includes all raw counts and summarised percentages for experiments which had SNCA FISH performed with SOX10 staining. It includes both 1-colour and 2-colour FISH experiments.
**All counts refer to SNCA copy number only

## Sheet: SNCA with Ref CNV counts
Donor ID	Region	Total cells	SOX10+	SOX10-	Total SNCA gains	Total REF gains	SNCA CN2	Total SNCA losses	Total REF losses	SOX10+ SNCA only Gains	SOX10- SNCA only gains	SOX10+ SNCA only losses	SOX10- SNCA only losses	Total SNCA only losses	Total SNCA only gains	Total REF only gain	Total REF only loss	Total both probe gain	Total both probe loss	SOX10+ both probe gain	SOX10- both probe gain	SOX10- both probe loss	SOX10+ both probe loss	SOX10+ REF only gain	SOX10+ REF only loss	SOX10- REF only gain	SOX10- REF only loss	Total SOX10+ SNCA losses	Total SOX10- SNCA losses	Total SOX10+ SNCA gains	Total SOX10- SNCA gains	% SOX10+ REF gain	% SOX10+ SNCA gain	% SOX10+ REF loss	% SOX10+ SNCA loss	% SOX10- REF gain	% SOX10- SNCA gain	% SOX10- REF loss	% SOX10- SNCA loss	% Both loss SOX10+	% Both gain SOX10+	% Both loss SOX10-	% Both gain SOX10-
Control09	Putamen	82	42	40	5	0	68	9	2	3	2	5	2	7	5	0	0	0	2	0	0	1	1	0	0	0	0	6	3	3	2	0	7.14286	2.38095	14.2857	0	5	2.5	7.5	2.38095	0	2.5	0
Control06	Putamen	84	64	20	1	0	82	1	3	1	0	0	0	0	1	0	2	0	1	0	0	0	1	0	2	0	0	1	0	1	0	0	1.5625	4.6875	1.5625	0	0	0	0	1.5625	0	0	0
Control04	Putamen	102	47	55	1	1	90	11	6	1	0	2	5	7	1	1	2	0	4	0	0	2	2	0	1	1	1	4	7	1	0	0	2.12766	6.38298	8.51064	1.81818	0	5.45455	12.7273	4.25532	0	3.63636	0
Control02	Putamen	74	17	57	3	1	67	4	3	0	2	1	3	4	2	0	3	1	0	0	1	0	0	0	1	0	2	1	3	0	3	0	0	5.88235	5.88235	1.75439	5.26316	3.50877	5.26316	0	0	0	1.75439
Control05	Putamen	98	61	37	2	0	89	7	3	1	1	4	1	5	2	0	1	0	2	0	0	2	0	0	1	0	0	4	3	1	1	0	1.63934	1.63934	6.55738	0	2.7027	5.40541	8.10811	0	0	5.40541	0
Control07	Putamen	98	53	45	2	3	88	8	8	1	1	2	2	4	2	3	4	0	4	0	0	2	2	2	2	1	2	4	4	1	1	3.77358	1.88679	7.54717	7.54717	2.22222	2.22222	8.88889	8.88889	3.77358	0	4.44444	0
Control13	Putamen	141	54	87	3	2	127	11	8	1	2	1	5	6	3	2	3	0	5	0	0	4	1	2	2	0	1	2	9	1	2	3.7037	1.85185	5.55556	3.7037	0	2.29885	5.74713	10.3448	1.85185	0	4.5977	0
Control14	Putamen	98	52	46	3	1	87	8	5	2	1	3	3	6	3	1	3	0	2	0	0	1	1	0	2	1	1	4	4	2	1	0	3.84615	5.76923	7.69231	2.17391	2.17391	4.34783	8.69565	1.92308	0	2.17391	0
Control15	Putamen	50	16	34	0	0	44	6	3	0	0	1	4	5	0	0	2	0	1	0	0	1	0	0	0	0	2	1	5	0	0	0	0	0	6.25	0	0	8.82353	14.7059	0	0	2.94118	0
OPCA12	Putamen	126	103	23	13	4	102	11	5	11	1	7	3	10	12	3	4	1	1	1	0	0	1	1	2	2	2	8	3	12	1	1.94175	11.6505	2.91262	7.76699	8.69565	4.34783	8.69565	13.0435	0.970874	0.970874	0	0
SND05	Putamen	90	52	38	7	0	70	13	5	4	3	5	4	9	7	0	1	0	4	0	0	1	3	0	0	0	1	8	5	4	3	0	7.69231	5.76923	15.3846	0	7.89474	5.26316	13.1579	5.76923	0	2.63158	0
SND12	Putamen	102	72	30	4	1	68	30	2	3	1	22	6	28	4	1	0	0	2	0	0	0	2	0	0	1	0	24	6	3	1	0	4.16667	2.77778	33.3333	3.33333	3.33333	0	20	2.77778	0	0	0
Control12	Cerebellum	85	20	65	1	0	81	3	2	0	1	1	2	3	1	0	2	0	0	0	0	0	0	0	0	0	2	1	2	0	1	0	0	0	5	0	1.53846	3.07692	3.07692	0	0	0	0
Control09	Cerebellum	131	47	84	2	0	126	3	4	0	2	0	3	3	2	0	4	0	0	0	0	0	0	0	1	0	3	0	3	0	2	0	0	2.12766	0	0	2.38095	3.57143	3.57143	0	0	0	0
Control11	Cerebellum	112	42	70	2	1	104	6	2	0	1	2	4	6	1	0	2	1	0	0	1	0	0	0	1	0	1	2	4	0	2	0	0	2.38095	4.7619	1.42857	2.85714	1.42857	5.71429	0	0	0	1.42857
Control01	Cerebellum	135	15	120	5	1	125	5	4	1	4	1	2	3	5	1	2	0	2	0	0	2	0	0	0	1	2	1	4	1	4	0	6.66667	0	6.66667	0.833333	3.33333	3.33333	3.33333	0	0	1.66667	0
Control04	Cerebellum	85	54	31	2	0	76	7	5	1	1	2	1	3	2	0	1	0	4	0	0	2	2	0	0	0	1	4	3	1	1	0	1.85185	3.7037	7.40741	0	3.22581	9.67742	9.67742	3.7037	0	6.45161	0
Control05	Cerebellum	62	33	29	1	0	54	7	3	0	1	3	2	5	1	0	1	0	2	0	0	1	1	0	0	0	1	4	3	0	1	0	0	3.0303	12.1212	0	3.44828	6.89655	10.3448	3.0303	0	3.44828	0
Control07	Cerebellum	80	64	16	5	0	66	9	7	4	1	5	1	6	5	0	4	0	3	0	0	1	2	0	2	0	2	7	2	4	1	0	6.25	6.25	10.9375	0	6.25	18.75	12.5	3.125	0	6.25	0
Control13	Cerebellum	144	67	77	5	2	132	7	5	2	2	4	1	5	4	1	3	1	2	0	1	2	0	1	3	0	0	4	3	2	3	1.49254	2.98507	4.47761	5.97015	1.2987	3.8961	2.5974	3.8961	0	0	2.5974	1.2987
Control14	Cerebellum	97	51	46	2	0	87	8	3	2	0	5	2	7	2	0	2	0	1	0	0	0	1	0	0	0	2	6	2	2	0	0	3.92157	1.96078	11.7647	0	0	4.34783	4.34783	1.96078	0	0	0
Control03	Cerebellum	152	56	96	6	0	140	6	6	2	4	1	3	4	6	0	4	0	2	0	0	2	0	0	3	0	1	1	5	2	4	0	3.57143	5.35714	1.78571	0	4.16667	3.125	5.20833	0	0	2.08333	0
SND05	Cerebellum	116	93	23	6	1	99	11	7	6	0	8	3	11	6	1	7	0	0	0	0	0	0	1	7	0	0	8	3	6	0	1.07527	6.45161	7.52688	8.60215	0	0	0	13.0435	0	0	0	0
Control09	SN	119	35	84	7	0	108	4	2	3	4	1	3	4	7	0	2	0	0	0	0	0	0	0	0	0	2	1	3	3	4	0	8.57143	0	2.85714	0	4.7619	2.38095	3.57143	0	0	0	0
Control11	SN	100	25	75	4	2	90	6	1	1	2	1	5	6	3	1	1	1	0	0	1	0	0	0	0	1	1	1	5	1	3	0	4	0	4	2.66667	4	1.33333	6.66667	0	0	0	1.33333
Control10	SN	75	26	49	5	0	65	5	1	2	3	1	3	4	5	0	0	0	1	0	0	1	0	0	0	0	0	1	4	2	3	0	7.69231	0	3.84615	0	6.12245	2.04082	8.16327	0	0	2.04082	0
Control06	SN	95	58	37	5	2	85	5	1	2	3	1	3	4	5	2	0	0	1	0	0	0	1	2	0	0	0	2	3	2	3	3.44828	3.44828	1.72414	3.44828	0	8.10811	0	8.10811	1.72414	0	0	0
Control05	SN	135	40	95	5	1	122	8	2	0	4	2	6	8	4	0	2	1	0	0	1	0	0	0	0	0	2	2	6	0	5	0	0	0	5	1.05263	5.26316	2.10526	6.31579	0	0	0	1.05263
Control07	SN	81	66	15	2	2	70	9	6	2	0	7	0	7	2	2	4	0	2	0	0	0	2	2	4	0	0	9	0	2	0	3.0303	3.0303	9.09091	13.6364	0	0	0	0	3.0303	0	0	0
Control13	SN	50	30	20	0	0	44	6	5	0	0	2	1	3	0	0	2	0	3	0	0	2	1	0	2	0	0	3	3	0	0	0	0	10	10	0	0	10	15	3.33333	0	10	0
Control14	SN	57	18	39	1	0	48	8	2	0	1	3	3	6	1	0	0	0	2	0	0	1	1	0	0	0	0	4	4	0	1	0	0	5.55556	22.2222	0	2.5641	2.5641	10.2564	5.55556	0	2.5641	0
Control15	SN	64	31	33	1	0	58	5	3	1	0	1	3	4	1	0	2	0	1	0	0	0	1	0	0	0	2	2	3	1	0	0	3.22581	3.22581	6.45161	0	0	6.06061	9.09091	3.22581	0	0	0
Control03	SN	86	38	48	6	3	73	7	1	0	5	1	6	7	5	2	1	1	0	0	1	0	0	2	1	0	0	1	6	0	6	5.26316	0	2.63158	2.63158	2.08333	12.5	0	12.5	0	0	0	2.08333
OPCA12	SN	129	105	24	7	0	111	11	5	7	0	7	2	9	7	0	3	0	2	0	0	1	1	0	3	0	0	8	3	7	0	0	6.66667	3.80952	7.61905	0	0	4.16667	12.5	0.952381	0	4.16667	0
SND12	SN	101	74	27	5	1	73	23	3	5	0	16	4	20	5	1	0	0	3	0	0	2	1	1	0	0	0	17	6	5	0	1.35135	6.75676	1.35135	22.973	0	0	7.40741	22.2222	1.35135	0	7.40741	0
This dataset includes all raw counts and summarised percentages for experiments which had SNCA and Chr 7 CEP (REF) FISH performed with SOX10 staining.

## Sheet: γH2AX counts summary
			aSyn staining subset										SOX10 staining subset
Donor	Region	Group	aSyn+ γH2AX+	aSyn+ γH2AX-	aSyn- γH2AX+	aSyn- γH2AX-	Total cells	% overall γH2AX+	% aSyn+	% aSyn+ γH2AX +	% aSyn- γH2AX+	Overall % γH2AX+	SOX10+ γH2AX+	SOX10+ γH2AX-	SOX10- γH2AX+	SOX10- γH2AX-	Total SOX10 cells	Total cells	% SOX10+ γH2AX+	% SOX10- γH2AX+	% overall γH2AX +	Mean overall γH2AX % (across both experiments)
Control10	Putamen	Control	0	0	38	1635	1673	2.27137	0	0	2.27137	2.27137	4	299	21	862	303	1186	1.32013	2.37826	2.10793	2.18965
Control10	SN	Control	0	0	0	568	568	0	0	0	0	0										0
Control10	Cerebellum	Control											6	105	14	1458	111	1583	5.40541	0.951087	1.26342	1.26342
Control12	Cerebellum	Control	0	0	67	526	593	11.2985	0	0	11.2985	11.2985										11.2985
Control12	Putamen	Control	0	0	9	1080	1089	0.826446	0	0	0.826446	0.826446										0.826446
Control12	SN	Control											6	97	10	618	103	731	5.82524	1.59236	2.18878	2.18878
Control14	Cerebellum	Control	0	0	22	555	577	3.81282	0	0	3.81282	3.81282										3.81282
Control14	SN	Control	0	0	48	594	642	7.47664	0	0	7.47664	7.47664										7.47664
OPCA10	Cerebellum	OPCA	2	7	35	200	244	15.1639	3.68852	22.2222	14.8936	15.1639										15.1639
OPCA10	SN	OPCA	18	9	44	108	179	34.6369	15.0838	66.6667	28.9474	34.6369										34.6369
OPCA02	Cerebellum	OPCA	4	11	28	100	143	22.3776	10.4895	26.6667	21.875	22.3776										22.3776
OPCA05	Cerebellum	OPCA	22	12	71	123	228	40.7895	14.9123	64.7059	36.5979	40.7895										40.7895
OPCA04	Putamen	OPCA	11	85	12	580	688	3.34302	13.9535	11.4583	2.02703	3.34302										3.34302
OPCA04	SN	OPCA											14	88	6	626	102	734	13.7255	0.949367	2.7248	2.7248
OPCA12	Cerebellum	OPCA											23	80	36	924	103	1063	22.3301	3.75	5.55033	5.55033
SND03	Cerebellum	SND	29	102	11	319	461	8.67679	28.4165	22.1374	3.33333	8.67679	25	148	21	856	173	1050	14.4509	2.39453	4.38095	6.52887
SND03	SN	SND											14	210	12	1087	224	1323	6.25	1.0919	1.96523	1.96523
SND11	SN	SND	5	90	40	1086	1221	3.6855	7.78051	5.26316	3.5524	3.6855										3.6855
SND12	Cerebellum	SND											24	143	80	1807	167	2054	14.3713	4.23953	5.06329	5.06329
SND12	SN	SND											33	162	26	673	195	894	16.9231	3.7196	6.59955	6.59955
This dataset includes the counts and summarised percentages for gH2AX experiments, separated by co-staining experiment (aSyn and SOX10). Where regions from the same donor were analysed across both staining subsets, the mean % γH2AX positivity was calculated for those.

## Sheet: Fig1c. Average % SOX10+ Gains
Donor_ID	Cell population	% Average SNCA gains
Control01	SOX10+ cells	4.183
Control02	SOX10+ cells	0
Control03	SOX10+ cells	1.7855
Control04	SOX10+ cells	1.99
Control05	SOX10+ cells	0.546333
Control06	SOX10+ cells	2.81967
Control07	SOX10+ cells	3.72233
Control08	SOX10+ cells	5.4
Control09	SOX10+ cells	5.238
Control10	SOX10+ cells	7.692
Control11	SOX10+ cells	2.04267
Control12	SOX10+ cells	0
Control13	SOX10+ cells	1.61233
Control14	SOX10+ cells	2.58933
Control15	SOX10+ cells	1.07533
OPCA01	SOX10+ cells	17.8867
OPCA02	SOX10+ cells	2.188
OPCA03	SOX10+ cells	10.883
OPCA04	SOX10+ cells	15.3217
OPCA05	SOX10+ cells	6.557
OPCA06	SOX10+ cells	14.161
OPCA07	SOX10+ cells	4.312
OPCA08	SOX10+ cells	16.6665
OPCA09	SOX10+ cells	3.68
OPCA10	SOX10+ cells	6.34167
OPCA11	SOX10+ cells	11.9295
OPCA12	SOX10+ cells	11.5023
SND01	SOX10+ cells	4.44067
SND02	SOX10+ cells	5.77333
SND04	SOX10+ cells	8.19367
SND05	SOX10+ cells	5.867
SND06	SOX10+ cells	4.1665
SND07	SOX10+ cells	7.692
SND08	SOX10+ cells	16.2067
SND09	SOX10+ cells	4.1935
SND10	SOX10+ cells	2.174
SND12	SOX10+ cells	5.462
SND13	SOX10+ cells	6.0175
SND14	SOX10+ cells	10.4693
SND15	SOX10+ cells	4.786

## Sheet: Fig1c. Average % SOX10- Gains
Donor_ID	Cell population	% Average SNCA gains
Control01	SOX10- cells	10
Control02	SOX10- cells	5.15
Control03	SOX10- cells	8.35
Control04	SOX10- cells	1.6
Control05	SOX10- cells	3.8
Control06	SOX10- cells	4.5
Control07	SOX10- cells	2.83333
Control08	SOX10- cells	3.43333
Control09	SOX10- cells	4.06667
Control10	SOX10- cells	6.1
Control11	SOX10- cells	2.86667
Control12	SOX10- cells	1.5
Control13	SOX10- cells	2.06667
Control14	SOX10- cells	1.6
Control15	SOX10- cells	0
OPCA01	SOX10- cells	8.9
OPCA02	SOX10- cells	4.53333
OPCA03	SOX10- cells	11.4
OPCA04	SOX10- cells	10.9
OPCA05	SOX10- cells	0
OPCA06	SOX10- cells	3.45
OPCA07	SOX10- cells	7.36667
OPCA08	SOX10- cells	6.95
OPCA09	SOX10- cells	8.2
OPCA10	SOX10- cells	4.8
OPCA11	SOX10- cells	10.15
OPCA12	SOX10- cells	12.5333
SND01	SOX10- cells	0
SND02	SOX10- cells	9.3
SND04	SOX10- cells	3.56667
SND05	SOX10- cells	1.3
SND06	SOX10- cells	7.9
SND07	SOX10- cells	5.7
SND08	SOX10- cells	7.86667
SND09	SOX10- cells	1.9
SND10	SOX10- cells	2.1
SND12	SOX10- cells	3.5
SND13	SOX10- cells	3.25
SND14	SOX10- cells	11.9333
SND15	SOX10- cells	4.43333

## Sheet: Fig1c. Average % SOX10+ Losses
Donor_ID	Cell population	% Average SOX10+ SNCA Losses
Control01	SOX10+ cells	7.77778
Control02	SOX10+ cells	8.08824
Control03	SOX10+ cells	2.20865
Control04	SOX10+ cells	7.95902
Control05	SOX10+ cells	7.89286
Control06	SOX10+ cells	2.81968
Control07	SOX10+ cells	10.707
Control08	SOX10+ cells	9.74167
Control09	SOX10+ cells	5.71429
Control10	SOX10+ cells	3.84615
Control11	SOX10+ cells	4.33907
Control12	SOX10+ cells	5
Control13	SOX10+ cells	6.55795
Control14	SOX10+ cells	13.8931
Control15	SOX10+ cells	7.40847
OPCA01	SOX10+ cells	12.0257
OPCA02	SOX10+ cells	11.6923
OPCA03	SOX10+ cells	10.6944
OPCA04	SOX10+ cells	16.9553
OPCA05	SOX10+ cells	14.7541
OPCA06	SOX10+ cells	10.3147
OPCA07	SOX10+ cells	14.2593
OPCA08	SOX10+ cells	12.5
OPCA09	SOX10+ cells	7.54079
OPCA10	SOX10+ cells	14.2308
OPCA11	SOX10+ cells	9.29825
OPCA12	SOX10+ cells	20.002
SND01	SOX10+ cells	9.90338
SND02	SOX10+ cells	12.1109
SND04	SOX10+ cells	7.62632
SND05	SOX10+ cells	15.3061
SND06	SOX10+ cells	15.4967
SND07	SOX10+ cells	6.41026
SND08	SOX10+ cells	11.1598
SND09	SOX10+ cells	10.3594
SND10	SOX10+ cells	13.6646
SND12	SOX10+ cells	28.1532
SND13	SOX10+ cells	18.961
SND14	SOX10+ cells	12.9686
SND15	SOX10+ cells	15.1676

## Sheet: Fig1c. Average % SOX10- Losses
Donor_ID	Cell population	% Average SOX10- SNCA losses
Control01	SOX10- cells	14.2
Control02	SOX10- cells	7.65
Control03	SOX10- cells	8.85
Control04	SOX10- cells	11.2
Control05	SOX10- cells	8.23333
Control06	SOX10- cells	3
Control07	SOX10- cells	7.13333
Control08	SOX10- cells	9.6
Control09	SOX10- cells	4.9
Control10	SOX10- cells	8.2
Control11	SOX10- cells	6.96667
Control12	SOX10- cells	3.1
Control13	SOX10- cells	9.73333
Control14	SOX10- cells	7.76667
Control15	SOX10- cells	11.2
OPCA01	SOX10- cells	13.6333
OPCA02	SOX10- cells	10.8
OPCA03	SOX10- cells	14.7333
OPCA04	SOX10- cells	20.5333
OPCA05	SOX10- cells	14.3
OPCA06	SOX10- cells	9
OPCA07	SOX10- cells	5.96667
OPCA08	SOX10- cells	9.15
OPCA09	SOX10- cells	10.95
OPCA10	SOX10- cells	11.1333
OPCA11	SOX10- cells	10.15
OPCA12	SOX10- cells	7.06667
SND01	SOX10- cells	8.86667
SND02	SOX10- cells	10.8333
SND04	SOX10- cells	7.76667
SND05	SOX10- cells	8.3
SND06	SOX10- cells	13.6
SND07	SOX10- cells	20
SND08	SOX10- cells	20.4
SND09	SOX10- cells	28.7
SND10	SOX10- cells	14.3
SND12	SOX10- cells	17.6667
SND13	SOX10- cells	15.95
SND14	SOX10- cells	8.36667
SND15	SOX10- cells	18.9333

## Sheet: Fig2b. SOX10+ Ref and SNCA Gain
Donor_ID	Region	Cell population	% REF gains	% SNCA gains
Control01	Cerebellum	SOX10+ cells	0	6.67
Control02	Putamen	SOX10+ cells	0	0
Control03	Cerebellum	SOX10+ cells	0	3.57
Control03	SN	SOX10+ cells	5.26	0
Control04	Cerebellum	SOX10+ cells	0	1.85
Control04	Putamen	SOX10+ cells	0	2.13
Control05	Cerebellum	SOX10+ cells	0	0
Control05	Putamen	SOX10+ cells	0	1.64
Control05	SN	SOX10+ cells	0	0
Control06	Putamen	SOX10+ cells	0	1.56
Control06	SN	SOX10+ cells	3.45	3.45
Control07	Cerebellum	SOX10+ cells	0	6.25
Control07	Putamen	SOX10+ cells	3.77	1.89
Control07	SN	SOX10+ cells	3.03	3.03
Control09	Cerebellum	SOX10+ cells	0	0
Control09	Putamen	SOX10+ cells	0	7.14
Control09	SN	SOX10+ cells	0	8.57
Control10	SN	SOX10+ cells	0	7.69
Control11	Cerebellum	SOX10+ cells	0	0
Control11	SN	SOX10+ cells	0	4
Control12	Cerebellum	SOX10+ cells	0	0
Control13	Cerebellum	SOX10+ cells	1.49	2.99
Control13	Putamen	SOX10+ cells	3.7	1.85
Control13	SN	SOX10+ cells	0	0
Control14	Cerebellum	SOX10+ cells	0	3.92
Control14	Putamen	SOX10+ cells	0	3.85
Control14	SN	SOX10+ cells	0	0
Control15	Putamen	SOX10+ cells	0	0
Control15	SN	SOX10+ cells	0	3.23
OPCA12	Putamen	SOX10+ cells	1.94	11.65
OPCA12	SN	SOX10+ cells	0	6.67
SND05	Cerebellum	SOX10+ cells	1.08	6.45
SND05	Putamen	SOX10+ cells	0	7.69
SND12	Putamen	SOX10+ cells	0	4.17
SND12	SN	SOX10+ cells	1.35	6.76

## Sheet: Fig2c SOX10- Ref and SNCA Gains
Donor_ID	Region	Cell population	% REF gains	% SNCA gains
Control01	Cerebellum	SOX10- cells	0.83	3.33
Control02	Putamen	SOX10- cells	1.75	5.26
Control03	Cerebellum	SOX10- cells	0	4.17
Control03	SN	SOX10- cells	2.08	12.5
Control04	Cerebellum	SOX10- cells	0	3.23
Control04	Putamen	SOX10- cells	1.82	0
Control05	Cerebellum	SOX10- cells	0	3.45
Control05	Putamen	SOX10- cells	0	2.7
Control05	SN	SOX10- cells	1.05	5.26
Control06	Putamen	SOX10- cells	0	0
Control06	SN	SOX10- cells	0	8.11
Control07	Cerebellum	SOX10- cells	0	6.25
Control07	Putamen	SOX10- cells	2.22	2.22
Control07	SN	SOX10- cells	0	0
Control09	Cerebellum	SOX10- cells	0	2.38
Control09	Putamen	SOX10- cells	0	5
Control09	SN	SOX10- cells	0	4.76
Control10	SN	SOX10- cells	0	6.12
Control11	Cerebellum	SOX10- cells	1.43	2.86
Control11	SN	SOX10- cells	2.67	4
Control12	Cerebellum	SOX10- cells	0	1.54
Control13	Cerebellum	SOX10- cells	1.3	3.9
Control13	Putamen	SOX10- cells	0	2.3
Control13	SN	SOX10- cells	0	0
Control14	Cerebellum	SOX10- cells	0	0
Control14	Putamen	SOX10- cells	2.17	2.17
Control14	SN	SOX10- cells	0	2.56
Control15	Putamen	SOX10- cells	0	0
Control15	SN	SOX10- cells	0	0
OPCA12	Putamen	SOX10- cells	8.7	4.35
OPCA12	SN	SOX10- cells	0	0
SND05	Cerebellum	SOX10- cells	0	0
SND05	Putamen	SOX10- cells	0	7.89
SND12	Putamen	SOX10- cells	3.33	3.33
SND12	SN	SOX10- cells	0	0

## Sheet: Fig2d. SOX10+ Ref and SNCA Loss
Donor_ID	Region	Cell population	% REF Losses	% SNCA losses
Control01	Cerebellum	SOX10+ cells	0	6.67
Control02	Putamen	SOX10+ cells	5.88	5.88
Control03	Cerebellum	SOX10+ cells	5.36	1.79
Control03	SN	SOX10+ cells	2.63	2.63
Control04	Cerebellum	SOX10+ cells	3.7	7.41
Control04	Putamen	SOX10+ cells	6.38	8.51
Control05	Cerebellum	SOX10+ cells	3.03	12.12
Control05	Putamen	SOX10+ cells	1.64	6.56
Control05	SN	SOX10+ cells	0	5
Control06	Putamen	SOX10+ cells	4.69	1.56
Control06	SN	SOX10+ cells	1.72	3.45
Control07	Cerebellum	SOX10+ cells	6.25	10.94
Control07	Putamen	SOX10+ cells	7.55	7.55
Control07	SN	SOX10+ cells	9.09	13.64
Control09	Cerebellum	SOX10+ cells	2.13	0
Control09	Putamen	SOX10+ cells	2.38	14.29
Control09	SN	SOX10+ cells	0	2.86
Control10	SN	SOX10+ cells	0	3.85
Control11	Cerebellum	SOX10+ cells	2.38	4.76
Control11	SN	SOX10+ cells	0	4
Control12	Cerebellum	SOX10+ cells	0	5
Control13	Cerebellum	SOX10+ cells	4.48	5.97
Control13	Putamen	SOX10+ cells	5.56	3.7
Control13	SN	SOX10+ cells	10	10
Control14	Cerebellum	SOX10+ cells	1.96	11.76
Control14	Putamen	SOX10+ cells	5.77	7.69
Control14	SN	SOX10+ cells	5.56	22.22
Control15	Putamen	SOX10+ cells	0	6.25
Control15	SN	SOX10+ cells	3.23	6.45
OPCA12	Putamen	SOX10+ cells	2.91	7.77
OPCA12	SN	SOX10+ cells	3.81	7.62
SND05	Cerebellum	SOX10+ cells	7.53	8.6
SND05	Putamen	SOX10+ cells	5.77	15.38
SND12	Putamen	SOX10+ cells	2.78	33.33
SND12	SN	SOX10+ cells	1.35	22.97

[truncated: 16 more sheets: Fig 2e. SOX10- Ref and SNCA los, Fig3a. Regional % SOX10+ Gains, Fig3b. Regional %SOX10- Gains, Fig4a. Regional % SOX10+ Losses, Fig4b. Regional % SOX10- Losses, Fig5a. Most vs Least , Fig5b. SOX10+ vs SOX10- Gains, Fig5c. SOX10+ Gains vs A.O.O, Fig5d. SOX10- Gains vs A.O.O., Fig6b. % γH2AX+ MSA v Control, Fig6c. % γH2AX+ SOX10+, Fig6d. % γH2AX+ SOX10-, Fig6e. % γH2AX+ aSyn+ vs aSyn-, Fig6f.% γH2AX+ affected regions, Supp Fig1b. aSyn NS vs Sections, Supp Fig 3a. GCI distribution]
